# Supplementary material for: The Affordable Care Act and Opioid Agonist Therapy for Opioid Use Disorder
Source: Atypon-hosted journal article supplement (doi:10.1176/appi.ps.201900025), 2019-04-30
Supplement: appi.ps.201900025.ds001.pdf [file appi.ps.201900025.ds001.pdf]

| <b>Appendix Table:</b> Predictors of opioid agonist therapy in outpatient admissions with primary opioid use disorder in Treatment Episode Data Set-Admissions, 2010-2016 (states with information on insurance status).                                                                                                                                                                                                                                                                                                                                         |                 |                 |                 |                 |                 |                 |                |               |
|------------------------------------------------------------------------------------------------------------------------------------------------------------------------------------------------------------------------------------------------------------------------------------------------------------------------------------------------------------------------------------------------------------------------------------------------------------------------------------------------------------------------------------------------------------------|-----------------|-----------------|-----------------|-----------------|-----------------|-----------------|----------------|---------------|
|                                                                                                                                                                                                                                                                                                                                                                                                                                                                                                                                                                  | <b>Model 1</b>  |                 | <b>Model 2</b>  |                 | <b>Model 3</b>  |                 | <b>Model 4</b> |               |
|                                                                                                                                                                                                                                                                                                                                                                                                                                                                                                                                                                  | <b>aOR</b>      | <b>95% CI</b>   | <b>aOR</b>      | <b>95% CI</b>   | <b>aOR</b>      | <b>95% CI</b>   | <b>aOR</b>     | <b>95% CI</b> |
| Period                                                                                                                                                                                                                                                                                                                                                                                                                                                                                                                                                           |                 |                 |                 |                 |                 |                 |                |               |
| 2010-2013                                                                                                                                                                                                                                                                                                                                                                                                                                                                                                                                                        | Ref             |                 | Ref             |                 | Ref             |                 | Ref            |               |
| 2014-2016                                                                                                                                                                                                                                                                                                                                                                                                                                                                                                                                                        | 1.16            | 1.15-1.17       | 1.16            | 1.15-1.17       | 0.93            | 0.90-0.96       | 0.96           | 0.93-0.99     |
| Expansion state <sup>a</sup>                                                                                                                                                                                                                                                                                                                                                                                                                                                                                                                                     | -- <sup>b</sup> | -- <sup>b</sup> | 1.66            | 0.70-3.95       | 1.49            | 0.62-3.55       | 1.54           | 0.64-3.69     |
| Period*Expansion state                                                                                                                                                                                                                                                                                                                                                                                                                                                                                                                                           | -- <sup>b</sup> | -- <sup>b</sup> | -- <sup>b</sup> | -- <sup>b</sup> | 1.28            | 1.24-1.32       | 1.03           | 0.99-1.06     |
| Medicaid insurance                                                                                                                                                                                                                                                                                                                                                                                                                                                                                                                                               | -- <sup>b</sup> | 1.79           | 1.77-1.81     |
| Age                                                                                                                                                                                                                                                                                                                                                                                                                                                                                                                                                              |                 |                 |                 |                 |                 |                 |                |               |
| <25                                                                                                                                                                                                                                                                                                                                                                                                                                                                                                                                                              | Ref             |                 | Ref             |                 | Ref             |                 | Ref            |               |
| 25-29                                                                                                                                                                                                                                                                                                                                                                                                                                                                                                                                                            | 1.63            | 1.60-1.65       | 1.63            | 1.60-1.65       | 1.63            | 1.60-1.65       | 1.58           | 1.56-1.61     |
| 30-39                                                                                                                                                                                                                                                                                                                                                                                                                                                                                                                                                            | 2.16            | 2.13-2.19       | 2.16            | 2.13-2.19       | 2.16            | 2.13-2.19       | 2.09           | 2.06-2.12     |
| 40-50                                                                                                                                                                                                                                                                                                                                                                                                                                                                                                                                                            | 2.73            | 2.68-2.78       | 2.73            | 2.68-2.78       | 2.73            | 2.68-2.78       | 2.68           | 2.63-2.73     |
| 50+                                                                                                                                                                                                                                                                                                                                                                                                                                                                                                                                                              | 4.14            | 4.06-4.22       | 4.14            | 4.06-4.22       | 4.14            | 4.06-4.22       | 3.98           | 3.91-4.06     |
| Female sex                                                                                                                                                                                                                                                                                                                                                                                                                                                                                                                                                       | 1.43            | 1.42-1.44       | 1.43            | 1.42-1.44       | 1.43            | 1.42-1.44       | 1.31           | 1.30-1.32     |
| Race/ethnicity                                                                                                                                                                                                                                                                                                                                                                                                                                                                                                                                                   |                 |                 |                 |                 |                 |                 |                |               |
| Non-Hispanic white                                                                                                                                                                                                                                                                                                                                                                                                                                                                                                                                               | Ref             |                 | Ref             |                 | Ref             |                 | Ref            |               |
| Non-Hispanic black                                                                                                                                                                                                                                                                                                                                                                                                                                                                                                                                               | 0.83            | 0.82-0.85       | 0.83            | 0.82-0.85       | 0.83            | 0.82-0.85       | 0.84           | 0.82-0.85     |
| Hispanic                                                                                                                                                                                                                                                                                                                                                                                                                                                                                                                                                         | 1.15            | 1.13-1.18       | 1.15            | 1.13-1.18       | 1.15            | 1.13-1.18       | 1.04           | 1.02-1.06     |
| Other                                                                                                                                                                                                                                                                                                                                                                                                                                                                                                                                                            | 0.95            | 0.91-0.98       | 0.95            | 0.91-0.98       | 0.95            | 0.91-0.98       | 0.81           | 0.78-0.84     |
| Homeless                                                                                                                                                                                                                                                                                                                                                                                                                                                                                                                                                         | 0.61            | 0.60-0.62       | 0.61            | 0.60-0.62       | 0.61            | 0.60-0.62       | 0.59           | 0.57-0.60     |
| Any prior treatment                                                                                                                                                                                                                                                                                                                                                                                                                                                                                                                                              | 0.89            | 0.88-0.90       | 0.89            | 0.88-0.90       | 0.89            | 0.88-0.91       | 0.88           | 0.87-0.89     |
| IV drug use <sup>c</sup>                                                                                                                                                                                                                                                                                                                                                                                                                                                                                                                                         | 1.10            | 1.09-1.11       | 1.10            | 1.09-1.11       | 1.10            | 1.09-1.11       | 1.10           | 1.08-1.11     |
| Heroin use <sup>c</sup>                                                                                                                                                                                                                                                                                                                                                                                                                                                                                                                                          | 1.95            | 1.91-1.98       | 1.95            | 1.91-1.98       | 1.96            | 1.92-1.99       | 2.00           | 1.96-2.03     |
| Other opioid use <sup>c</sup>                                                                                                                                                                                                                                                                                                                                                                                                                                                                                                                                    | 1.12            | 1.11-1.14       | 1.12            | 1.11-1.14       | 1.13            | 1.11-1.14       | 1.12           | 1.11-1.14     |
| Data from Treatment Episode Data Set-Admissions (TEDS-A).                                                                                                                                                                                                                                                                                                                                                                                                                                                                                                        |                 |                 |                 |                 |                 |                 |                |               |
| Abbreviations: aOR stands for adjusted odds ratio, CI for confidence interval, IV drug use for intravenous drug use.                                                                                                                                                                                                                                                                                                                                                                                                                                             |                 |                 |                 |                 |                 |                 |                |               |
| <sup>a</sup> Expansion states with insurance information included 20 states (Arkansas, Colorado, Delaware, Hawaii, Illinois, Indiana, Iowa, Kentucky, Maryland, Massachusetts, Nevada, New Hampshire, New Jersey, New Mexico, Ohio, Oregon, Pennsylvania, Rhode Island, Vermont, and West Virginia); non-expansion states included 11 states (Alabama, Alaska, Idaho, Louisiana, Maine, Mississippi, Missouri, Nebraska, South Dakota, Texas, Utah). District of Columbia was categorized along with expansion states and Puerto Rico with non-expansion states. |                 |                 |                 |                 |                 |                 |                |               |
| <sup>b</sup> Not in the model.                                                                                                                                                                                                                                                                                                                                                                                                                                                                                                                                   |                 |                 |                 |                 |                 |                 |                |               |
| <sup>c</sup> Based on type of substance and route of administration for primary, secondary or tertiary substances.                                                                                                                                                                                                                                                                                                                                                                                                                                               |                 |                 |                 |                 |                 |                 |                |               |
